# Supplementary material for: Biological recognition of graphene nanoflakes
Source: Springer Nature journal article supplement (doi:10.1038/s41467-018-04009-x), 2018-04-16
Supplement: 41467_2018_4009_MOESM2_ESM.pdf [file 41467_2018_4009_MOESM2_ESM.pdf]

## **Description of Additional Supplementary Files**

File Name: Supplementary Data 1

Description: Complete list of proteins for graphene exfoliated with 100% FBS as identified by MS and analysed by MaxQuant by the method of normalised spectral counts (NSpC). From this lists, keratin contaminations has been removed as well as proteins with NSpC < 0.1.

File Name: Supplementary Data 2

Description: Complete list of proteins for graphene exfoliated with 100% HS as identified by MS and analysed by MaxQuant by the method of normalised spectral counts (NSpC). From this lists, keratin contaminations has been removed as well as proteins with NSpC < 0.1.
