# Supplementary material for: Biological recognition of graphene nanoflakes
Source: Springer Nature journal article supplement (doi:10.1038/s41467-018-04009-x), 2018-04-16
Supplement: 41467_2018_4009_MOESM3_ESM.pdf [file 41467_2018_4009_MOESM3_ESM.pdf]

|    | Protein names                              | Mol. weight [kDa] | SpC | NSpC %      |
|----|--------------------------------------------|-------------------|-----|-------------|
| 1  | Serum albumin                              | 69.293            | 136 | 8.825879054 |
| 2  | Hemoglobin subunit alpha                   | 15.184            | 23  | 6.811614614 |
| 3  | Apolipoprotein A-I                         | 30.276            | 32  | 4.752913488 |
| 4  | Hemoglobin subunit beta                    | 15.859            | 14  | 3.969727211 |
| 5  | Alpha-2-HSglycoprotein                     | 38.418            | 27  | 3.160366427 |
| 6  | Histone H4                                 | 11.367            | 7   | 2.769240074 |
| 7  | Apolipoprotein E                           | 35.979            | 20  | 2.499708315 |
| 8  | Alpha-1-antiproteinase                     | 46.103            | 24  | 2.340941079 |
| 9  | Complement C3                              | 187.25            | 73  | 1.753111188 |
| 10 | Alpha-2-macroglobulin                      | 167.57            | 62  | 1.663810449 |
| 11 | Fibrinogen alpha chain                     | 67.011            | 24  | 1.61054762  |
| 12 | Transgelin-2                               | 22.426            | 8   | 1.604155988 |
| 13 | Insulin-like growth factor-binding protein | 34.015            | 12  | 1.586423733 |
| 14 | Kininogen-1                                | 68.889            | 24  | 1.566642085 |
| 15 | Actin, cytoplasmic 2                       | 41.792            | 14  | 1.50641041  |
| 16 | Vitamin D-binding protein                  | 53.341            | 17  | 1.433165007 |
| 17 | Histone H2B type 1-K                       | 13.875            | 4   | 1.296389268 |
| 18 | Alpha-fetoprotein                          | 68.587            | 19  | 1.245719381 |
| 19 | Inter-alpha-trypsin inhibitor heavy chain  | 101.51            | 28  | 1.240388215 |
| 20 | Plasminogen                                | 91.215            | 25  | 1.232486508 |
| 21 | Ubiquitin-60S ribosomal protein L40        | 14.728            | 4   | 1.22130643  |
| 22 | Histone H3.3                               | 15.328            | 4   | 1.17349955  |
| 23 | Secreted phosphoprotein 24                 | 23.134            | 6   | 1.166296431 |
| 24 | Fetuin-B                                   | 42.663            | 11  | 1.159443851 |
| 25 | Glyceraldehyde-3-phosphate dehydrogenase   | 35.868            | 9   | 1.128349851 |

|    |                                     |        |    |             |
|----|-------------------------------------|--------|----|-------------|
| 26 | Hemoglobin subunit beta             | 15.954 | 4  | 1.127453999 |
| 27 | Antithrombin-III                    | 52.347 | 13 | 1.116760341 |
| 28 | Tetranectin                         | 22.144 | 5  | 1.015365398 |
| 29 | Plasma serine protease inhibitor    | 45.296 | 10 | 0.992769841 |
| 30 | Apolipoprotein C-IV                 | 14.437 | 3  | 0.934442808 |
| 31 | Junction plakoglobin                | 81.82  | 16 | 0.879364512 |
| 32 | RaSrelated protein Rap-1            | 20.825 | 4  | 0.863740749 |
| 33 | Adiponectin                         | 26.133 | 5  | 0.860377736 |
| 34 | Peptidoglycan recognition protein 1 | 21.063 | 4  | 0.853980966 |
| 35 | Leukocyte cell-derived chemotaxin-2 | 16.32  | 3  | 0.826626889 |
| 36 | Alpha-2-antiplasmin                 | 54.71  | 10 | 0.821943022 |
| 37 | Cathelicidin-4                      | 16.479 | 3  | 0.81865106  |
| 38 | Calpain small subunit 1             | 27.931 | 5  | 0.80499271  |
| 39 | Heat shock protein beta-1           | 22.393 | 4  | 0.803259996 |
| 40 | Pigment epithelium-derived factor   | 46.228 | 8  | 0.778203733 |
| 41 | Serpin A3-2                         | 46.236 | 8  | 0.778069085 |
| 42 | L-lactate dehydrogenase A chain     | 36.597 | 6  | 0.737249    |
| 43 | Carboxypeptidase                    | 48.821 | 8  | 0.736871473 |
| 44 | Protein AMBP                        | 39.234 | 6  | 0.687696937 |
| 45 | Histone H2A.V                       | 13.509 | 2  | 0.665756203 |
| 46 | Ribonuclease 4                      | 13.741 | 2  | 0.654515723 |
| 47 | Heat shock cognate 71 kDa protein   | 71.24  | 10 | 0.631225474 |
| 48 | Clusterin O                         | 51.113 | 7  | 0.615850213 |
| 49 | Peroxiredoxin-1                     | 22.209 | 3  | 0.607436212 |
| 50 | Profilin-1                          | 15.057 | 2  | 0.597310258 |
| 51 | Prothrombin O                       | 70.505 | 9  | 0.574025281 |
| 52 | Transthyretin                       | 15.727 | 2  | 0.571863709 |

|    |                                              |        |    |             |
|----|----------------------------------------------|--------|----|-------------|
| 53 | TP-binding nuclear protein Ran               | 24.423 | 3  | 0.55237075  |
| 54 | Apolipoprotein A-IV                          | 43.017 | 5  | 0.522682925 |
| 55 | Nucleoside diphosphate kinase A 2            | 17.298 | 2  | 0.519927191 |
| 56 | Hemopexin                                    | 52.209 | 6  | 0.51679024  |
| 57 | Arginase-1 O                                 | 35.009 | 4  | 0.513793627 |
| 58 | Complement factor H                          | 140.37 | 16 | 0.512571093 |
| 59 | Cathelicidin-6                               | 17.852 | 2  | 0.503792323 |
| 60 | 14-3-3 protein sigma                         | 27.849 | 3  | 0.484417782 |
| 61 | Beta-2-glycoprotein 1                        | 38.252 | 4  | 0.470234265 |
| 62 | Elongation factor 1-alpha 1                  | 50.14  | 5  | 0.448429425 |
| 63 | Peroxiredoxin-2                              | 21.946 | 2  | 0.409810469 |
| 64 | Inter-alpha-trypsin inhibitor heavy chain H3 | 99.55  | 9  | 0.406545982 |
| 65 | 60S acidic ribosomal protein P2              | 11.702 | 1  | 0.384280488 |
| 66 | Cytochrome c                                 | 11.703 | 1  | 0.384247652 |
| 67 | Dynein light chain 4, axonemal               | 12.009 | 1  | 0.37445668  |
| 68 | High mobility group protein B2               | 24.033 | 2  | 0.374222966 |
| 69 | Tubulin beta-4B chain                        | 49.83  | 4  | 0.360975338 |
| 70 | Adenylyl cyclase-associated protein 1        | 51.272 | 4  | 0.350823083 |
| 71 | Annexin A2                                   | 38.612 | 3  | 0.349387517 |
| 72 | Complement C1q subcomponent subunit A        | 25.802 | 2  | 0.348566024 |
| 73 | Factor XIIa inhibitor                        | 51.723 | 4  | 0.347764072 |
| 74 | Coagulation factor V                         | 248.98 | 19 | 0.343160717 |
| 75 | Triosephosphate isomerase                    | 26.689 | 2  | 0.336981548 |
| 76 | Alpha-1B-glycoprotein                        | 53.553 | 4  | 0.335880363 |
| 77 | Beta-2-microglobulin                         | 13.677 | 1  | 0.328789228 |
| 78 | 14-3-3 protein zeta/delta                    | 27.745 | 2  | 0.324155723 |

|     |                                                         |        |    |             |
|-----|---------------------------------------------------------|--------|----|-------------|
| 79  | Complement factor D                                     | 27.878 | 2  | 0.322609246 |
| 80  | Insulin-like growth factor-binding protein 4            | 27.89  | 2  | 0.322470439 |
| 81  | Plasma kallikrein                                       | 70.993 | 5  | 0.316710822 |
| 82  | Fibronectin                                             | 272.15 | 19 | 0.313945086 |
| 83  | Histidine-rich glycoprotein (Fragments)                 | 44.47  | 3  | 0.30336296  |
| 84  | Fatty acid-binding protein, epidermal                   | 15.074 | 1  | 0.298318315 |
| 85  | Protein-lysine 6-oxidase                                | 47.004 | 3  | 0.28700857  |
| 86  | Adenosylhomocysteinase                                  | 47.637 | 3  | 0.283194803 |
| 87  | Plakophilin-1                                           | 80.179 | 5  | 0.28042569  |
| 88  | Cystatin-C                                              | 16.265 | 1  | 0.276474041 |
| 89  | Fibrinogen gamma-B chain                                | 50.243 | 3  | 0.268506077 |
| 90  | Lysozyme C, milk isozyme                                | 16.782 | 1  | 0.267956756 |
| 91  | Calmodulin                                              | 16.837 | 1  | 0.267081444 |
| 92  | Peptidyl-prolyl cis-trans isomerase A                   | 17.869 | 1  | 0.251656515 |
| 93  | Cofilin-1                                               | 18.518 | 1  | 0.242836714 |
| 94  | Lumican O                                               | 38.756 | 2  | 0.232059566 |
| 95  | ADP-ribosylation factor 3                               | 20.601 | 1  | 0.218283106 |
| 96  | Gamma-glutamylcyclotransferase                          | 21.177 | 1  | 0.212345954 |
| 97  | Histone H1.2                                            | 21.355 | 1  | 0.21057599  |
| 98  | RaS-related C3 botulinum toxin substrate 2              | 21.424 | 1  | 0.209897791 |
| 99  | Phospholipid glutathione hydroperoxidase, mitochondrial | 22.24  | 1  | 0.202196505 |
| 100 | Secernin-1                                              | 46.201 | 2  | 0.19466463  |
| 101 | Serpin H1                                               | 46.506 | 2  | 0.193387962 |
| 102 | Alpha-enolase                                           | 47.326 | 2  | 0.1900372   |

|     |                                                     |        |   |             |
|-----|-----------------------------------------------------|--------|---|-------------|
| 103 | Insulin-like growth factor-binding protein 6        | 24.967 | 1 | 0.180111758 |
| 104 | Inter-alpha-trypsin inhibitor                       | 101.24 | 4 | 0.177670892 |
| 105 | Glutathione peroxidase 3                            | 25.663 | 1 | 0.175226991 |
| 106 | Coagulation factor IX                               | 52.045 | 2 | 0.172806236 |
| 107 | Cartilage oligomeric matrix protein                 | 82.362 | 3 | 0.163795814 |
| 108 | Outer dense fiber protein                           | 29.435 | 1 | 0.152772219 |
| 109 | Voltage-dependent anion-selective channel protein 3 | 30.738 | 1 | 0.146296124 |
| 110 | Voltage-dependent anion-selective channel protein 2 | 31.619 | 1 | 0.142219876 |
| 111 | Elongation factor 2                                 | 95.367 | 3 | 0.141459318 |
| 112 | Cadherin-1                                          | 97.936 | 3 | 0.13774864  |
| 113 | Calponin-2                                          | 33.437 | 1 | 0.134487253 |
| 114 | Thrombospondin-4                                    | 105.97 | 3 | 0.127305377 |
| 115 | Malate dehydrogenase, mitochondrial                 | 35.668 | 1 | 0.126075201 |
| 116 | Heterogeneous nuclear ribonucleoproteins A2/B1      | 36.006 | 1 | 0.124891692 |
| 117 | L-lactate dehydrogenase B chain                     | 36.723 | 1 | 0.122453238 |
| 118 | Hepatocyte growth factor-like protein               | 79.972 | 2 | 0.112460618 |
| 119 | Vasodilator-stimulated phosphoprotein               | 40.463 | 1 | 0.111134871 |
| 120 | Heat shock protein HSP 90-beta                      | 83.252 | 2 | 0.108029844 |
| 121 | Actin, alpha cardiac muscle 1                       | 42.019 | 1 | 0.10701945  |

**Supplementary Data 1:** complete list of proteins for graphene exfoliated with 100% FBS as identified by MS and analysed by MaxQuant by the method of normalised spectral counts (NSpC). From this lists, keratin contaminations has been removed as well as proteins with NSpC < 0.1.
