# Supplementary material for: Biological recognition of graphene nanoflakes
Source: PubMed Central journal article supplement (PMC5910434; doi:10.1038/s41467-018-04009-x), 2018-04-20
Supplement: 41467_2018_4009_MOESM4_ESM.pdf [file 41467_2018_4009_MOESM4_ESM.pdf]

|    | Protein names                                | Mol. weight [kDa] | SpC | NSpC %      |
|----|----------------------------------------------|-------------------|-----|-------------|
| 1  | Serum albumin                                | 69.366            | 140 | 10.02047216 |
| 2  | Apolipoprotein A-I                           | 30.777            | 53  | 8.54980849  |
| 3  | Apolipoprotein E                             | 36.154            | 32  | 4.394408504 |
| 4  | Vitronectin                                  | 54.305            | 47  | 4.296994935 |
| 5  | Alpha-1-antitrypsin                          | 46.736            | 32  | 3.399423251 |
| 6  | Apolipoprotein A-IV                          | 45.398            | 29  | 3.171524563 |
| 7  | Hemoglobin subunit beta                      | 15.998            | 10  | 3.103423964 |
| 8  | Apolipoprotein A-II                          | 5.8767            | 3   | 2.534513073 |
| 9  | Complement C3                                | 187.15            | 91  | 2.414117269 |
| 10 | L-lactate dehydrogenase A chain              | 4.5344            | 2   | 2.189863117 |
| 11 | Antithrombin-III                             | 52.602            | 22  | 2.076477482 |
| 12 | Histidine-rich glycoprotein                  | 59.578            | 23  | 1.916676057 |
| 13 | Apolipoprotein C-I                           | 8.647             | 3   | 1.722513354 |
| 14 | Clusterin                                    | 48.803            | 16  | 1.627722118 |
| 15 | Apolipoprotein C-III                         | 10.852            | 3   | 1.372518704 |
| 16 | Ig lambda-3 chain C regions                  | 11.237            | 3   | 1.325493724 |
| 17 | Hemoglobin subunit alpha                     | 15.257            | 4   | 1.301660263 |
| 18 | Ig kappa chain V-III region                  | 11.746            | 3   | 1.26805491  |
| 19 | Alpha-1-antichymotrypsin                     | 47.65             | 12  | 1.250331414 |
| 20 | Immunoglobulin J chain                       | 8.1675            | 2   | 1.215759451 |
| 21 | Protein IGHV3-74                             | 12.839            | 3   | 1.160103822 |
| 22 | Gelsolin                                     | 85.696            | 20  | 1.158713979 |
| 23 | Inter-alpha-trypsin inhibitor heavy chain H2 | 105.21            | 24  | 1.132559489 |
| 24 | Serum amyloid A-4 protein                    | 14.746            | 3   | 1.010075476 |
| 25 | Alpha-2-macroglobulin                        | 163.29            | 32  | 0.97296494  |
| 26 | Alpha-enolase;Beta-enolase;Gamma-enolase     | 36.928            | 7   | 0.941128781 |
| 27 | Kininogen-1                                  | 47.883            | 9   | 0.93318545  |

|    |                                              |        |    |             |
|----|----------------------------------------------|--------|----|-------------|
| 28 | Platelet factor 4                            | 10.845 | 2  | 0.915603072 |
| 29 | Ig kappa chain V-II region                   | 11.043 | 2  | 0.899186391 |
| 30 | Dermcidin                                    | 11.284 | 2  | 0.879981861 |
| 31 | Ig heavy chain V-III region                  | 11.612 | 2  | 0.855125329 |
| 32 | Actin, cytoplasmic 2                         | 41.792 | 7  | 0.83159465  |
| 33 | Immunoglobulin lambda-like polypeptide 5     | 24.83  | 4  | 0.799815974 |
| 34 | Serum amyloid P-component                    | 25.387 | 4  | 0.782267721 |
| 35 | Inter-alpha-trypsin inhibitor heavy chain H4 | 103.36 | 15 | 0.720519204 |
| 36 | Histone H2A                                  | 6.8918 | 1  | 0.720400717 |
| 37 | Cystatin-A                                   | 7.0861 | 1  | 0.700647417 |
| 38 | Apolipoprotein C-IV                          | 14.553 | 2  | 0.682313978 |
| 39 | Ig alpha-1 chain C region                    | 37.654 | 5  | 0.659273604 |
| 40 | Histone H3.1                                 | 15.404 | 2  | 0.644619275 |
| 41 | Pigment epithelium-derived factor            | 46.312 | 6  | 0.64322737  |
| 42 | Inter-alpha-trypsin inhibitor heavy chain H1 | 101.39 | 13 | 0.636582992 |
| 43 | Elongation factor 1-alpha 1                  | 15.936 | 2  | 0.623099606 |
| 44 | Apolipoprotein C-II                          | 8.1463 | 1  | 0.609461677 |
| 45 | Heparin cofactor 2                           | 57.07  | 7  | 0.608971502 |
| 46 | Fibronectin                                  | 239.62 | 29 | 0.600871681 |
| 47 | Hemopexin                                    | 51.676 | 6  | 0.57645998  |
| 48 | Aldo-keto reductase family 1 member C3       | 17.563 | 2  | 0.565376947 |
| 49 | Glyceraldehyde-3-phosphate dehydrogenase     | 36.053 | 4  | 0.550839892 |
| 50 | Haptoglobin                                  | 45.205 | 5  | 0.549149171 |
| 51 | Alpha-2-HSglycoprotein                       | 39.324 | 4  | 0.505020614 |
| 52 | Plasma protease C1 inhibitor                 | 49.757 | 5  | 0.498910471 |
| 53 | Apolipoprotein D                             | 21.275 | 2  | 0.466731625 |
| 54 | Peroxiredoxin-2                              | 10.676 | 1  | 0.465048488 |

|    |                                               |        |    |             |
|----|-----------------------------------------------|--------|----|-------------|
| 55 | Ig kappa chain V-III region NG9               | 10.729 | 1  | 0.462751203 |
| 56 | Protein IGHV3-72                              | 11.167 | 1  | 0.444600847 |
| 57 | Aldo-keto reductase family 1 member C2        | 22.631 | 2  | 0.438766087 |
| 58 | Histone H4                                    | 11.367 | 1  | 0.436778188 |
| 59 | Lysozyme C                                    | 11.488 | 1  | 0.432177721 |
| 60 | Ig kappa chain V-I                            | 11.788 | 1  | 0.421178967 |
| 61 | Ig kappa chain V-I                            | 11.842 | 1  | 0.419258373 |
| 62 | Ig lambda chain V-III                         | 11.935 | 1  | 0.415991425 |
| 63 | Complement C1q subcomponent subunit B         | 24.117 | 2  | 0.41173095  |
| 64 | HCG2041221                                    | 12.145 | 1  | 0.40879849  |
| 65 | Complement factor H                           | 139.09 | 11 | 0.392648172 |
| 66 | Ig kappa chain C region                       | 25.6   | 2  | 0.387879505 |
| 67 | Serotransferrin                               | 77.063 | 6  | 0.386555752 |
| 68 | Apolipoprotein B-100                          | 515.6  | 39 | 0.375541987 |
| 69 | Protein S100-A9                               | 13.242 | 1  | 0.374932613 |
| 70 | Ig kappa chain V-IV region                    | 13.38  | 1  | 0.371065595 |
| 71 | Platelet basic protein                        | 13.894 | 1  | 0.357338251 |
| 72 | Complement factor B                           | 85.532 | 6  | 0.348280713 |
| 73 | Insulin-like growth factor-binding protein 3  | 14.9   | 1  | 0.333211923 |
| 74 | Plasminogen                                   | 90.568 | 6  | 0.328914693 |
| 75 | Transthyretin                                 | 15.12  | 1  | 0.328363602 |
| 76 | Plasma serine protease inhibitor              | 45.674 | 3  | 0.326106165 |
| 77 | Erythrocyte band 7 integral membrane protein  | 31.73  | 2  | 0.312944069 |
| 78 | Transketolase                                 | 16.559 | 1  | 0.299828351 |
| 79 | C4b-binding protein alpha chain               | 67.033 | 4  | 0.296263492 |
| 80 | Eukaryotic translation initiation factor 5A-1 | 16.773 | 1  | 0.296002961 |
| 81 | Vitamin D-binding protein                     | 53.02  | 3  | 0.28092367  |

|     |                                       |        |   |             |
|-----|---------------------------------------|--------|---|-------------|
| 82  | Tetranectin                           | 17.794 | 1 | 0.279018639 |
| 83  | Ig gamma-2 chain C region             | 35.9   | 2 | 0.276593741 |
| 84  | Ig gamma-4 chain C region             | 35.94  | 2 | 0.276285902 |
| 85  | Apolipoprotein L1                     | 18.108 | 1 | 0.274180343 |
| 86  | Retinal dehydrogenase 1               | 54.861 | 3 | 0.271496564 |
| 87  | Leucine-rich alpha-2-glycoprotein     | 38.177 | 2 | 0.260096794 |
| 88  | Glucose-6-phosphate dehydrogenase 1-  | 59.256 | 3 | 0.251359744 |
| 89  | Proteoglycan 4                        | 102.51 | 5 | 0.242164553 |
| 90  | Complement component C9               | 63.173 | 3 | 0.235774349 |
| 91  | Prothrombin                           | 70.036 | 3 | 0.212670241 |
| 92  | Vimentin                              | 49.653 | 2 | 0.199982183 |
| 93  | Glutathione peroxidase 3              | 25.402 | 1 | 0.195451447 |
| 94  | Complement C1q subcomponent subunit C | 25.773 | 1 | 0.192637941 |
| 95  | Myosin-V                              | 26.456 | 1 | 0.187664713 |
| 96  | Angiotensinogen                       | 53.154 | 2 | 0.186810312 |
| 97  | Alpha-2-antiplasmin                   | 54.565 | 2 | 0.181979571 |
| 98  | Ceruloplasmin                         | 97.712 | 3 | 0.152433406 |
| 99  | Alpha-1B-glycoprotein                 | 33.455 | 1 | 0.148404055 |
| 100 | Selenoprotein P                       | 35.116 | 1 | 0.141384487 |
| 101 | Plasma kallikrein                     | 71.369 | 2 | 0.139132051 |
| 102 | Ig alpha-2 chain C region             | 36.526 | 1 | 0.135926673 |
| 103 | Peptidoglycan recognition protein 3   | 37.611 | 1 | 0.132005468 |
| 104 | Complement C1s subcomponent           | 75.905 | 2 | 0.130817671 |
| 105 | Beta-2-glycoprotein 1                 | 38.298 | 1 | 0.129637518 |
| 106 | Complement C1r subcomponent           | 76.613 | 2 | 0.129608752 |
| 107 | Protein AMBP                          | 38.999 | 1 | 0.127307307 |
| 108 | Serum paraoxonase/arylesterase 1      | 39.731 | 1 | 0.12496181  |
| 109 | Pyruvate kinase                       | 40.189 | 1 | 0.123537726 |
| 110 | Ig gamma-3 chain C region             | 41.287 | 1 | 0.120252323 |

**Supplementary Data 2:** complete list of proteins for graphene exfoliated with 100% HS as identified by MS and analysed by MaxQuant by the method of normalised spectral counts (NSpC). From this lists, keratin contaminations has been removed as well as proteins with NSpC < 0.1.
